# Supplementary material
Source: MDPI journal article supplement (https://www.mdpi.com/2073-4433/12/6/696)
Supplement: s1 [file s1]

# Supplementary Materials: Dust capturing capacity of urban green spaces in Taiwan

## Atmosphere 2021

Yi-Chung Wang<sup>1</sup>, Bixia Chen<sup>2,3\*</sup>

Supplementary table 1 Surveyed Clean Air Zones (CAZs) in north of Taiwan

| Sample plot number | County          | Location                                                 | GPS coordinates | Establishment year | Area   | Species number | Tree number |
|--------------------|-----------------|----------------------------------------------------------|-----------------|--------------------|--------|----------------|-------------|
|                    |                 |                                                          |                 |                    | (ha)   |                |             |
| 1                  | Taipei City     | Beishihu Environmental Protection Park, Gong 107         | 336621, 2775205 | 1997               | 0.547  | 10             | 114         |
| 2                  | Taipei City     | Zhouzi No. 2 Environmental Protection Park, Gong 105     | 307330, 2774695 | 1997               | 0.57   | 7              | 170         |
| 3                  | New Taipei City | Waste Landfill Greening Plan, Jianguo Section 880 No 880 | 284562, 2760956 | 2004               | 0.1666 | 6              | 49          |
| 4                  | New Taipei City | Zhonghe Park Greening Project                            | 301885, 2766233 | 2001               | 0.3145 | 12             | 93          |
| 5                  | New Taipei City | Tuchengding New Park                                     | 291835, 2760714 | 2008               | 1.8    | 12             | 202         |
| 6                  | New Taipei City | Putouqiao Waste Landfill Greening Project                | 300507, 2793692 | 2005               | 0.236  | 8              | 59          |
| 7                  | New Taipei City | Dakan Waste Dump                                         | 293308, 2783580 | 1998               | 1.989  | 12             | 146         |
| 8                  | Taoyuan County  | Zhogyuan Road Environmental Park, Zhongli City           | 272994, 2763510 | 1997               | 1.164  | 21             | 161         |
| 9                  | Taoyuan County  | Tianjin Environmental Protection Park                    | 269934, 2755934 | 1999               | 0.21   | 19             | 67          |
| 10                 | Taoyuan County  | Caoluo No. 8 Park, Gong 8                                | 263491, 2770934 | 1995               | 0.321  | 11             | 189         |
| 11                 | Taoyuan County  | Jingguo Environmental Park, Gong 12                      | 279637, 2768912 | 1997               | 0.2    | 6              | 136         |
| 12                 | Taoyuan County  | Tongde Environmental Park, Gong 7                        | 278966, 2767676 | 1997               | 0.834  | 18             | 238         |
| 13                 | Taoyuan County  | Zhongxing Environmental Park                             | 257418, 2767792 | 2000               | 0.2    | 7              | 57          |

|    |                |                                                                                                            |                  |      |        |    |      |
|----|----------------|------------------------------------------------------------------------------------------------------------|------------------|------|--------|----|------|
| 14 | Taoyuan County | Gonglin 6 Dinghu Environmental Park                                                                        | 285226, 2771327  | 1997 | 0.19   | 9  | 76   |
| 15 | Nantou County  | Parami Boulevard and Ecological Pond Greening, Mingjian Xinmin Village                                     | 218336, 2635574  | 2003 | 0.18   | 49 | 571  |
| 16 | Nantou County  | Jiji No. 1 Road                                                                                            | 228039, 2635889  | 1998 | 0.57   | 3  | 721  |
| 17 | Nantou County  | Jiji No. 3 Cemetery Bare Land Greening Project                                                             | 228455, 2637032  | 2008 | 1.1    | 3  | 164  |
| 18 | Nantou County  | Yuchi Elementery School (Yuchi Township Environmental Quality Improvement Greening Project                 | 242739, 2644088  | 2006 | 0.5    | 5  | 94   |
| 19 | Nantou County  | Gong 30 Environmental Park                                                                                 | 246277, 2650473  | 1996 | 0.02   | 11 | 51   |
| 20 | Taichung City  | Tuchengli Bare Land Greening                                                                               | 220894, 2664837  | 2008 | 0.8    | 14 | 461  |
| 21 | Taichung City  | Dali Gongqi Park                                                                                           | 246554, 2666835  | 1997 | 1.501  | 16 | 267  |
| 22 | Taichung City  | daping City Liyuan Park                                                                                    | 222109, 2672841  | 2004 | 0.94   | 31 | 392  |
| 23 | Taichung City  | Qingshui Haifengli Park                                                                                    | 210153, 2688010  | 2008 | 0.59   | 21 | 160  |
| 24 | Hsinchu County | Fuxing Clean Air Zone                                                                                      | 251338, 2746045  | 2004 | 4.8    | 38 | 1181 |
| 25 | Keelung City   | Zhangtanduan Sijie Taidi 195 and other sites's Waste Landfill Greening Plan                                | 329652, 2782162  | 2007 | 1.4086 | 15 | 224  |
| 26 | Keelung City   | Tianwaitian Waste and sanitary Landfill closed Rehabilitation and Park Greening and Beautification Project | 327491 , 2779773 | 1996 | 1.061  | 7  | 208  |
| 27 | Keelung City   | Shenao Jingyin Menghu Environmental Park                                                                   | 327206, 2781594  | 1999 | 0.3    | 42 | 305  |
| 28 | Miaoli County  | Pantao Section Huozhuang Subsectiion Waste Landfill Greening                                               | 237866, 2732030  | 2005 | 0.15   | 2  | 103  |
| 29 | Miaoli County  | Tongluoquan Section Bare Land Greening                                                                     | 245795, 2729632  | 2007 | 0.21   | 4  | 37   |
| 30 | Miaoli County  | Xu Niang Memorial Park                                                                                     | 240237, 2730953  | 2003 | 0.22   | 8  | 149  |
| 31 | Yilan County   | Suao Public Office Rear                                                                                    | 334293, 2721412  | 2002 | 0.005  | 2  | 35   |
| 32 | Yilan County   | Erjie Village Waste Dump                                                                                   | 321810, 2741825  | 2002 | 0.0275 | 2  | 128  |

|    |                |                                                                            |                 |      |         |    |     |
|----|----------------|----------------------------------------------------------------------------|-----------------|------|---------|----|-----|
| 33 | Yilan County   | Zhongshan Park                                                             | 326889, 2730378 | 2003 | 0.5     | 24 | 187 |
| 34 | Yilan County   | Xuejin National Elementray School Front                                    | 327050, 2733652 | 2006 | 0.005   | 3  | 29  |
| 35 | Yilan County   | Jiaoxi National Elementrary School Front                                   | 327835, 2746221 | 2006 | 0.005   | 6  | 25  |
| 36 | Yilan County   | Sudong Middle Road Port Authority Side                                     | 335946, 2721480 | 2002 | 0.023   | 7  | 53  |
| 37 | Yilan County   | Qinhe Road 1 Section Lize Tennis Court                                     | 332426, 2729504 | 2006 | 0.002   | 3  | 8   |
| 38 | Hualien County | Environmental Protection Technology Park Entrance                          | 290881, 2620925 | 2008 | 0.1366  | 3  | 133 |
| 39 | Hualien County | Environmental Protection Forest Park Boulevard                             | 293880, 2625078 | 1998 | 1.448   | 14 | 608 |
| 40 | Hualien County | Jian Township Chuying Cycling Lane                                         | 304374, 2650317 | 2007 | 0.58    | 9  | 183 |
| 41 | Miaoli County  | Shanliao Sub-section No. 885                                               | 234754, 2732613 | 2007 | 0.66    | 7  | 96  |
| 42 | Miaoli County  | Lida Section No.07.08, Zhunan Township                                     | 236865, 2731805 | 2006 | 0.46183 | 10 | 101 |
| 43 | Miaoli County  | Lida Section No. 19.20, Zhunan Township                                    | 236810, 2731474 | 2006 | 0.39193 | 14 | 51  |
| 44 | Miaoli County  | Zhunan Dapu Section, Zhongdapu Sub-section No. 52.4                        | 238108, 2733347 | 2007 | 2.7262  | 13 | 109 |
| 45 | Miaoli County  | (Shinnanli, Zhunan Township), Pedestrian Square behind the railway station | 237897, 2731059 | 1998 | 0.828   | 10 | 110 |
| 46 | Taichung City  | Taiping Liyuan Section, No. 1005                                           | 221786, 2672650 | 2009 | 0.68    | 23 | 255 |
| 47 | Taichung City  | Wuri Township, Ershan Environmental Protection Park                        | 211358, 2667788 | 1998 | 0.257   | 14 | 125 |
| 48 | Taichung City  | Lingongqi                                                                  | 211412, 2667736 | 1998 | 0.232   | 5  | 49  |

Supplementary table 2 Surveyed Clean Air Zones (CAZs) in south of Taiwan

| Sample plot number | County          | Location                                                                                                                   | GPS coordinates | Establishment year | Area   | Species number | Tree number |
|--------------------|-----------------|----------------------------------------------------------------------------------------------------------------------------|-----------------|--------------------|--------|----------------|-------------|
| 1                  | Changhua County | Hemei Township Waste (Slag) Landfill Greening Project                                                                      | 202089, 2669081 | 29-May-05          | 0.1484 | 4              | 51          |
| 2                  | Changhua County | Yongnan Cemetery Bare land Greening Project                                                                                | 203324, 2645799 | 2-Feb-09           | 0.3    | 8              | 77          |
| 3                  | Changhua County | Bare Land Greening Project Surrounding Dongheli Resource Recycling Field                                                   | 185228, 2644236 | 12-Jan-07          | 0.2629 | 2              | 31          |
| 4                  | Changhua County | Ershui Station (Minzu Road and Huimin Road Section Greening Land)                                                          | 211253, 2634236 | 29-Jun-01          | 0.0282 | 2              | 10          |
| 5                  | Changhua County | Gong 4-1(Tianzhong Township 1st Environmental Park)                                                                        | 208507, 2639652 | 14-Jul-97          | 0.29   | 17             | 47          |
| 6                  | Changhua County | Gong 4-2(Tianzhong Environmental Park)                                                                                     | 208472, 2639449 | 14-Jul-97          | 0.13   | 9              | 27          |
| 7                  | Changhua County | Township Office Rongguang Community Greening Project and other 4 sites (Square in the front of Rongguang Community Center) | 206867, 2635135 | 22-Dec-00          | 0.04   | 2              | 5           |
| 8                  | Yunlin County   | Bare Land Greening Project Surrounding Linnei Station                                                                      | 211029, 2628683 | 13-May-06          | 0.1611 | 8              | 44          |
| 9                  | Yunlin County   | Dounan Township NanchangLi Wufu Yuanhuan Bare Land Greening Project                                                        | 196667, 2618745 | 1-Aug-08           | 0.2838 | 9              | 33          |
| 10                 | Yunlin County   | Dounan Township Xiqili Park 3 Bare Land Greening Project                                                                   | 196170, 2620099 | 28-Oct-08          | 0.3595 | 4              | 37          |
| 11                 | Yunlin County   | Lunbei Township Luocuo Community Southside Lunqiu Greening Project                                                         | 185448, 2627672 | 9-Feb-09           | 0.44   | 9              | 74          |
| 12                 | Yunlin County   | Erlun Township Dazhuang and Tianwei Section Bare Land Greening Project-2(Tianwei Section 252)                              | 190023, 2627653 | 13-Jan-08          | 0.264  | 6              | 153         |
| 13                 | Yunlin County   | Erlun Township Dazhuang and Tian Wei Section Bare Land Greening Project-3 (Tianwei Section No. 195 and 198)                | 191120, 2628225 | 13-Jan-08          | 0.3658 | 5              | 43          |
| 14                 | Yunlin County   | Lunbei Township Dayou Environmental Planning Project                                                                       | 179962, 2628863 | 7-Jul-06           | 0.7711 | 3              | 163         |

|    |                |                                                                                                    |                 |           |         |    |     |
|----|----------------|----------------------------------------------------------------------------------------------------|-----------------|-----------|---------|----|-----|
| 15 | Yunlin County  | Baozhong Township Waste Disposal Site Bare Land Greening Project                                   | 179941, 2626773 | 19-Dec-08 | 0.4     | 1  | 6   |
| 16 | Chiayi County  | Dalin Township Minghuali Xiapitou Sub-section 486 and Others Bare Land Greening Project            | 193397, 2610598 | 9-Nov-09  | 0.685   | 3  | 143 |
| 17 | Chiayi County  | Chiayi City Fuguo Rezoning Zone Bare Land Vegetation Planting and Dust Prevention Project          | 195603, 2596691 | 1-Nov-05  | 0.1883  | 11 | 43  |
| 18 | Chiayi County  | Taibao City Xianghe Section 0636 Waste Disposal Site Greening Project                              | 181840, 2595495 | 30-Dec-05 | 0.17086 | 7  | 122 |
| 19 | Chiayi County  | Waste Site Recovery Project Area (Puzi City Environmental Park)                                    | 173355, 2595423 | 22-Sep-96 | 0.556   | 31 | 224 |
| 20 | Chiayi County  | Chiayi City Qiming Road Greening Project (Qiming Park)                                             | 195078, 2597324 | 8-Jul-96  | 0.407   | 22 | 145 |
| 21 | Chiayi County  | Lucao Township Zhuzijiao Section 530-5 Waste Disposal Site Greening Project                        | 177458, 2587950 | 14-Nov-07 | 0.6602  | 20 | 143 |
| 22 | Tainan City    | Xinying City Gonger 48 (Xindong Environmental Park)                                                | 180962, 2579381 | 23-Apr-97 | 0.62    | 16 | 203 |
| 23 | Tainan City    | Xinyinggong 50 Lu 62 Environmental Park Air Quality Improvement Greening Project                   | 181138, 2579590 | 24-Apr-97 | 0.085   | 19 | 118 |
| 24 | Tainan City    | Tainan City West Section Gonger 12 Greening Project (Guangxianli)                                  | 166964, 2545035 | 20-Dec-00 | 0.3     | 15 | 126 |
| 25 | Tainan City    | Gonger 14 (Anshun Rezoning Zone)-Anqing Park                                                       | 169413, 2548802 | 30-Dec-96 | 0.46    | 17 | 75  |
| 26 | Tainan City    | Gonger 6 (Benuanliao Rezoning Zone)-Huaian Park                                                    | 165769, 2550314 | 15-Nov-96 | 0.52    | 12 | 80  |
| 27 | Tainan City    | Taina City Cycling Land Planning and Construction Project                                          | 170499, 2544698 | 4-Mar-02  | 1.2(km) | 3  | 184 |
| 28 | Tainan City    | Metropolitan Area (Datong Road-Dongmen Road) Cycling Lane Construction Project                     | 169638, 2542539 | 7-Sep-06  | 1.2(km) | 5  | 147 |
| 29 | Kaohsiung City | Cycling Land Between Agongdian River Left Bank and Tongxiao Road (Hehua Road Bridge to Julun Road) | 175829, 2521929 | 21-Dec-06 | 1.0(km) | 3  | 191 |
| 30 | Kaohsiung City | Huishhe Village Park Bare Land Greening Project                                                    | 188203, 2500028 | 7-Sep-06  | 0.1754  | 7  | 80  |
| 31 | Kaohsiung City | Fuxing Elementary School Waste Disposal Site Greening Project                                      | 179203, 2501057 | 7-Apr-07  | 0.2     | 8  | 50  |
| 32 | Kaohsiung City | Aozidi 05-Er-05 (Bowen Children's Playground)                                                      | 178771, 2508537 | 6-Sep-97  | 0.11    | 5  | 51  |
| 33 | Kaohsiung City | Zhongli Environmental Park (Gong 3)                                                                | 183685, 2513757 | 31-Jan-98 | 0.3918  | 14 | 124 |

|    |                 |                                                                                            |                   |           |           |    |     |
|----|-----------------|--------------------------------------------------------------------------------------------|-------------------|-----------|-----------|----|-----|
| 34 | Kaohsiung City  | Gonger 19 (Fengdong Children's Park)                                                       | 1,862,962,503,103 | 30-Jun-97 | 0.256     | 8  | 90  |
| 35 | Kaohsiung City  | Fengshan City Bare Land Dust Improving Greening Project (Gonger 10: Wenfu Children's Park) | 182882, 2504188   | 10-Mar-99 | 0.25      | 12 | 61  |
| 36 | Pingtung County | Baoli Metropolitan Area Bare Land Greening Project                                         | 222651, 2440292   | 16-Dec-05 | 0.2       | 2  | 5   |
| 37 | Pingtung County | Chaozhou Theme Park Greening Project                                                       | 203779, 2494233   | 4-Feb-03  | 3         | 75 | 470 |
| 38 | Pingtung County | Dongmenxi Cycling Lane                                                                     | 223999, 2433030   | 17-Nov-08 | 1.7       | 7  | 60  |
| 39 | Pingtung County | Gong 24 (Chonglan Environmental Park)                                                      | 196495, 2509730   | 15-Aug-98 | 0.986     | 12 | 129 |
| 40 | Pingtung County | Township Office Road Greening Project (Zhongshan Road)                                     | 208100, 2474798   | 15-Sep-00 | 1.122(km) | 1  | 71  |
| 41 | Pingtung County | Public land (1016 Shouyuan Section 0857) Bare Land Greening Project                        | 202694, 2487441   | 12-Dec-08 | 0.581642  | 10 | 48  |
| 42 | Pingtung County | Wuluo Community Center Greening Project                                                    | 200234, 2519046   | 28-Nov-01 | 0.035     | 16 | 63  |
| 43 | Taitung County  | Museum Park Construction Greening Project                                                  | 265343, 2518349   | 29-Nov-07 | 2.3       | 12 | 236 |
| 44 | Taitung County  | Chulu Section 597-18                                                                       | 259494, 2528832   | 5-Dec-99  | 0.0944    | 4  | 21  |
| 45 | Taitung County  | Fuwen Community Greening, Fuwen Village (Fuyuan Village)                                   | 271696, 2557808   | 3-Jul-00  | 0.05      | 6  | 18  |
| 46 | Taitung County  | Gaotai Section Bare Land Greening Project                                                  | 290713, 2559053   | 25-Mar-07 | 0.4       | 1  | 68  |
| 47 | Taitung County  | Fuwen Community Greening, Fuwen Village (Wanan Village)                                    | 272415, 2555058   | 3-Jul-00  | 0.04      | 6  | 63  |
| 48 | Taitung County  | Deqi Section 890、892、893 Bare land Greening Project                                        | 250273, 2500753   | 10-Oct-06 | 0.5401    | 8  | 60  |
| 49 | Taitung County  | Cycling Land establishment Project (Gaotai Tea Plantation Overlooking View Route)          | 262786, 2535824   | 10-Jun-01 | 2.9(km)   | 12 | 227 |
| 50 | Chiayi City     | Jiushujia Hospital Square Bare Land Greening Project                                       | 177460, 2587978   | 2-Feb-07  | 1.0229    | 5  | 97  |

Supplementary table 3 Important Value Index tree species ranking in north of Taiwan

| Taipei City                   |       | New Taipei City                   |       | Keelung City                   |       | Yilan County                 |       | Huanlien County              |       |
|-------------------------------|-------|-----------------------------------|-------|--------------------------------|-------|------------------------------|-------|------------------------------|-------|
| Species                       | IVI   | Species                           | IVI   | Species                        | IVI   | Species                      | IVI   | Species                      | IVI   |
| <i>Cinnamomum camphora</i>    | 16.36 | <i>Ficus microcarpa</i>           | 15.69 | <i>Ficus microcarpa</i>        | 20.43 | <i>Ficus microcarpa</i>      | 24.63 | <i>Swietenia macrophylla</i> | 32.74 |
| <i>Liquidambar formosana</i>  | 10.69 | <i>Prunus sp</i>                  | 10.31 | <i>Pongamia pinnata</i>        | 9.2   | <i>Cinnamomum burmanii</i>   | 8.75  | <i>Cinnamomum burmanii</i>   | 10.85 |
| <i>Palimara Alstonia</i>      | 9.71  | <i>Ficus benjamina</i>            | 9.54  | <i>Palaquium formosanum</i>    | 6.13  | <i>Terminalia boivinii</i>   | 5.42  | <i>Distylium gracile</i>     | 8.2   |
| <i>Ficus microcarpa</i>       | 8.48  | <i>Cinnamomum camphora</i>        | 7.85  | <i>Koelreuteria henryi</i>     | 4.24  | <i>Bischofia javanica</i>    | 5.07  | <i>Tabebuia chrysanth</i>    | 7.72  |
| <i>Terminalia boivinii</i>    | 8.42  | <i>Koelreuteria henryi Dummer</i> | 7.34  | <i>Casuarina equisetifolia</i> | 3.79  | <i>Liquidambar formosana</i> | 4.89  | <i>Palaquium formosanum</i>  | 7.25  |
| <i>Prunus sp</i>              | 7.42  | <i>Terminalia boivinii</i>        | 4.5   | <i>Mallotus paniculatus</i>    | 2.77  | <i>Garcinia subelliptica</i> | 4.37  | <i>Michelia compressa</i>    | 3.58  |
| <i>Melia azedarach</i>        | 3.55  | <i>Melia azedarach</i>            | 3.58  | <i>Fraxinus formosana</i>      | 2.44  | <i>Ficus superba</i>         | 4.15  | <i>Magnolia grandiflora</i>  | 3.18  |
| <i>Lagerstroemia speciosa</i> | 3.38  | <i>Ficus elastica</i>             | 3.44  | <i>Tamarix chinensis</i>       | 2.43  | <i>Cinnamomum camphora</i>   | 3.8   | <i>Bischofia javanica</i>    | 2.91  |
| <i>Eucalyptus robusta</i>     | 2.73  | <i>Hibiscus tiliaceus</i>         | 3.04  | <i>Ficus bengalensis</i>       | 2.22  | <i>Celtis sinensis</i>       | 3.01  | <i>Melia azedarach</i>       | 2.6   |
| <i>Mangifera indica</i>       | 2.57  | <i>Delonix regia</i>              | 2.76  | <i>Morus australis</i>         | 2.2   | <i>Plumeria rubra</i>        | 2.91  | <i>Mangifera indica</i>      | 2.08  |
| Taoyuan City                  |       | Hsinchu City                      |       | Miaoli County                  |       | Taichung City                |       | Nantou County                |       |
| Species                       | IVI   | Species                           | IVI   | Species                        | IVI   | Species                      | IVI   | Species                      | IVI   |
| <i>Ficus microcarpa</i>       | 15.25 | <i>Cinnamomum camphora</i>        | 23.4  | <i>Ficus microcarpa</i>        | 5.8   | <i>Palimara Alstonia</i>     | 8.91  | <i>Cinnamomum burmanii</i>   | 25.48 |
| <i>Ficus benjamina</i>        | 7.62  | <i>Bischofia javanica</i>         | 7.86  | <i>Koelreuteria henryi</i>     | 5.76  | <i>Pongamia pinnata</i>      | 6.18  | <i>Terminalia boivinii</i>   | 18.5  |
| <i>Cinnamomum camphora</i>    | 6.53  | <i>Terminalia boivinii</i>        | 7.8   | <i>Bombax malabarica</i>       | 3     | <i>Melia azedarach</i>       | 5.43  | <i>Koelreuteria henryi</i>   | 12.83 |

|                             |      |                                |      |                                |      |                            |      |                                 |      |
|-----------------------------|------|--------------------------------|------|--------------------------------|------|----------------------------|------|---------------------------------|------|
| <i>Koelreuteria henryi</i>  | 6.53 | <i>Koelreuteria henryi</i>     | 7.04 | <i>Pongamia pinnata</i>        | 3.91 | <i>Terminalia boivinii</i> | 5.2  | <i>Artocarpus heterophyllus</i> | 9.4  |
| <i>Bischofia javanica</i>   | 6.4  | <i>Fraxinus formosana</i>      | 6    | <i>Bauhinia blakeana</i>       | 3.82 | <i>Cinnamomum camphora</i> | 5.06 | <i>Hibiscus tiliaceus</i>       | 4.72 |
| <i>Palimara Alstonia</i>    | 6.23 | <i>Ulmus parvifolia</i>        | 5.24 | <i>Delonix regia</i>           | 3.15 | <i>Cassia fistula</i>      | 4.67 | <i>Calocedrus formosana</i>     | 4.41 |
| <i>Araucaria excelsa</i>    | 6    | <i>Pourthiaea beauverdiana</i> | 4.71 | <i>Casuarina equisetifolia</i> | 1.99 | <i>Koelreuteria henryi</i> | 4    | <i>Tabebuia chrysantha</i>      | 2.6  |
| <i>Pongamia pinnata</i>     | 5.4  | <i>Pterocarpus indicus</i>     | 4.21 | <i>Bischofia javanica</i>      | 2.84 | <i>Ficus microcarpa</i>    | 3.92 | <i>Fraxinus formosana</i>       | 2.52 |
| <i>Palaquium formosanum</i> | 3.79 | <i>Garcinia subelliptica</i>   | 3.64 | <i>Palimara Alstonia</i>       | 1.8  | <i>Prunus sp</i>           | 3.59 | <i>Ficus microcarpa</i>         | 2.23 |
| <i>Melia azedarach</i>      | 3.53 | <i>Melia azedarach</i>         | 3.04 | <i>Cinnamomum camphora</i>     | 2.05 | <i>Tabebuia chrysantha</i> | 3.51 | <i>Prunus sp</i>                | 1.95 |

Supplementary table 4 Important Value Index tree species ranking in south of Taiwan

| Changhua County              |       | Yunlin County                |       | Tainan City                    |       | Chiayi County                |      |
|------------------------------|-------|------------------------------|-------|--------------------------------|-------|------------------------------|------|
| Species                      | IVI   | Species                      | IVI   | Species                        | IVI   | Species                      | IVI  |
| <i>Cassia fistula</i>        | 40.42 | <i>Terminalia boivinii</i>   | 21.59 | <i>Ficus microcarpa</i>        | 29.77 | <i>Alstonia scholaris</i>    | 12.5 |
| <i>Terminalia boivinii</i>   | 10.68 | <i>Pongamia pinnata</i>      | 12.16 | <i>Cassia fistula</i>          | 27.37 | <i>Sterculia foetida</i>     | 8.34 |
| <i>Chorisia speciosa</i>     | 6.68  | <i>Cassia fistula</i> L.     | 11.71 | <i>Tabebuia chrysantha</i>     | 6.79  | <i>Cassia fistula</i>        | 8.26 |
| <i>Bischofia javanica</i>    | 6.32  | <i>Koelreuteria henryi</i>   | 11.36 | <i>Terminalia boivinii</i>     | 5.36  | <i>Koelreuteria henryi</i>   | 8.19 |
| <i>Delonix regia</i>         | 6.1   | <i>Chorisia speciosa</i>     | 9.37  | <i>Pongamia pinnata</i>        | 3.88  | <i>Spathodea campanulata</i> | 6.95 |
| <i>Swietenia macrophylla</i> | 4.83  | <i>Fraxinus formosana</i>    | 7.87  | <i>Koelreuteria henryi</i>     | 3.81  | <i>Mangifera indica</i>      | 6.71 |
| <i>Pterocarpus indicus</i>   | 4.61  | <i>Diospyros ferrea</i>      | 6     | <i>Ficus elastica</i>          | 3.4   | <i>Fraxinus formosana</i>    | 6.06 |
| <i>Cinnamomum camphora</i>   | 3.46  | <i>Swietenia macrophylla</i> | 5.65  | <i>Couroupita guianensis</i>   | 3.31  | <i>Swietenia macrophylla</i> | 4.07 |
| <i>Ficus religiosa</i>       | 3.15  | <i>Terminalia catappa</i>    | 3.21  | <i>Alstonia scholaris</i> (L.) | 2.87  | <i>Terminalia boivinii</i>   | 3.57 |
| <i>Koelreuteria henryi</i>   | 2.52  | <i>Cinnamomum burmanii</i>   | 2.19  | <i>Terminalia catappa</i>      | 2.32  | <i>Cinnamomum camphora</i>   | 3.52 |
| Kaohsiung City               |       | Pingtung County              |       | Taitung County                 |       |                              |      |
| Species                      | IVI   | Species                      | IVI   | Species                        | IVI   |                              |      |



|                              |       |                                |       |                            |       |
|------------------------------|-------|--------------------------------|-------|----------------------------|-------|
| <i>Ficus religiosa</i> L.    | 28.54 | <i>Alstonia scholaris</i>      | 12.49 | <i>Terminalia catappa</i>  | 48.91 |
| <i>Pterocarpus indicus</i>   | 22.16 | <i>Terminalia boivinii</i>     | 8.65  | <i>Cinnamomum camphora</i> | 7.46  |
| <i>Ficus microcarpa</i>      | 9.92  | <i>Ficus microcarpa</i>        | 8.18  | <i>Ficus superba</i>       | 6.89  |
| <i>Terminalia boivinii</i>   | 6.03  | <i>Senna siamea</i>            | 7.85  | <i>Delonix regia</i>       | 6.17  |
| <i>Swietenia macrophylla</i> | 5.74  | <i>Delonix regia</i>           | 6.77  | <i>Bischofia javanica</i>  | 5.02  |
| <i>Cinnamomum camphora</i>   | 3.18  | <i>Cinnamomum camphora</i>     | 5.86  | <i>Ficus microcarpa</i>    | 3.69  |
| <i>Koelreuteria henryi</i>   | 3.14  | <i>Swietenia macrophylla</i>   | 4.57  | <i>Bauhinia variegata</i>  | 3.18  |
| <i>Cassia fistula</i>        | 2.94  | <i>Podocarpus macrophyllus</i> | 4.55  | <i>Pongamia pinnata</i>    | 2.58  |
| <i>Bischofia javanica</i>    | 2.8   | <i>Cassia fistula</i>          | 4.39  | <i>Senna surattensis</i>   | 2.35  |
| <i>Chorisia speciosa</i>     | 2.08  | <i>Murraya euchrestifolia</i>  | 3.52  | <i>Melia azedarach</i>     | 1.81  |

Supplementary table 5 Average dust load and foliar sizes on the seedlings in the north part of Taiwan

| Species                    | Dust load (g) | Foliar size (cm <sup>2</sup> ) | Dust load(mg/cm <sup>2</sup> /day) |
|----------------------------|---------------|--------------------------------|------------------------------------|
| <i>Ficus microcarpa</i>    | 0.03±0.02     | 139.2±30.2                     | 0.11±0.2                           |
| <i>Prunus sp</i>           | 0.07±0.06     | 359.8±54.7                     | 0.15±0.2                           |
| <i>Cinnamomum campora</i>  | 0.02±0.01     | 231.2±24.8                     | 0.05±0.1                           |
| <i>Cinnamomum burmanii</i> | 0.07±0.03     | 385.2±84.9                     | 0.17±0.14                          |
| <i>Bischofia javanica</i>  | 0.11±0.10     | 1748.1±626.5                   | 0.05±0.1                           |
| <i>Melia azedarach</i>     | 3.13±5.00     | 5484.3±880.5                   | 0.64±1.1                           |
| <i>Pongamia pinnata</i>    | 0.11±0.05     | 5231.9±1124.0                  | 0.02±0.02                          |
| <i>Alstonia scholaris</i>  | 0.06±0.04     | 999.1±70.2                     | 0.05±0.1                           |
| <i>Terminalia boivinii</i> | 0.03±0.01     | 70.3±16.2                      | 0.36±0.4                           |

---

|                            |           |                |          |
|----------------------------|-----------|----------------|----------|
| <i>Koelreuteria henryi</i> | 4.49±2.94 | 10219.7±2929.6 | 0.36±0.4 |
|----------------------------|-----------|----------------|----------|

---

## Supplementary table 6

Average dust load and foliar sizes of the seedlings in the south part of Taiwan

| Species                      | Dust load (g) | Foliar size (cm <sup>2</sup> ) | Dust load(mg/cm <sup>2</sup> ) |
|------------------------------|---------------|--------------------------------|--------------------------------|
| <i>Swietenia macrophylla</i> | 0.026±0.007   | 157.3±82.4                     | 0.039±0.028                    |
| <i>Delonix regia</i>         | 0.014±0.005   | 76.5±48.2                      | 0.043±0.019                    |
| <i>Cassia fistula</i>        | 0.016±0.003   | 105.9±61.0                     | 0.035±0.020                    |
| <i>Tabebuia chrysantha</i>   | 0.022±0.007   | 120.3±65.6                     | 0.031±0.009                    |
| <i>Fraxinus formosana</i>    | 0.005±0.004   | 58.9±34.2                      | 0.018±0.017                    |
| <i>Pterocarpus indicus</i>   | 0.011±0.005   | 60.4±40.4                      | 0.043±0.033                    |
| <i>Ficus religiosa</i>       | 0.002±0.002   | 19.9±10.3                      | 0.020±0.020                    |
| <i>Spathodea campanulata</i> | 0.023±0.005   | 71.5±43.0                      | 0.054±0.016                    |
| <i>Senna siamea</i>          | 0.012±0.003   | 82.8±43.0                      | 0.037±0.019                    |

---
